# Supplementary material
Source: Royal Society of Chemistry journal article supplement (doi:10.1039/d6mh00083e)
Supplement: d6mh00083e1.pdf [file d6mh00083e1.pdf]

## Supplementary Information for

# Dual-Target, High-Capacity Removal of Microplastics and Dyes from Water by a Recyclable Sponge Monolith

*Ting Huang<sup>1, #</sup>, Fangtian Liu<sup>1, #</sup>, Yifei Liu<sup>1</sup>, Bingchen Wu<sup>1</sup>, Xiaowen Shi<sup>1</sup>, Yang Wu<sup>1, \*</sup>, Hongbing Deng<sup>1, \*</sup>, Xue Zhou<sup>2, \*</sup>*

<sup>1</sup>Hubei Key Laboratory of Biomass Resource Chemistry and Environmental Biotechnology, Hubei International Scientific and Technological Cooperation Base of Sustainable Resource and Energy, Hubei Engineering Center of Natural Polymers-based Medical Materials, School of Resource and Environmental Science, Wuhan University, Wuhan 430079, China.

<sup>2</sup>Key Laboratory of Environment and Health, Ministry of Education, Department of Occupational and Environmental Health, School of Public Health, Tongji Medical College, Huazhong University of Science and Technology, Wuhan, 430030, China

# These authors contributed equally to this work.

\* Corresponding authors.

Email: [youngwu@whu.edu.cn](mailto:youngwu@whu.edu.cn) (Y. Wu); [hbdeng@whu.edu.cn](mailto:hbdeng@whu.edu.cn) (H. Deng);  
[xue.zhou@hust.edu.cn](mailto:xue.zhou@hust.edu.cn) (X. Zhou).

**Keywords:** chitin; microplastic; dye; co-removal; wastewater treatment

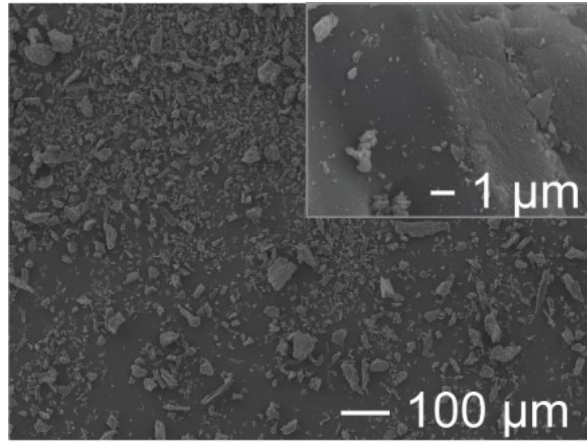

**Fig. S1. SEM of AC (400 mesh).**

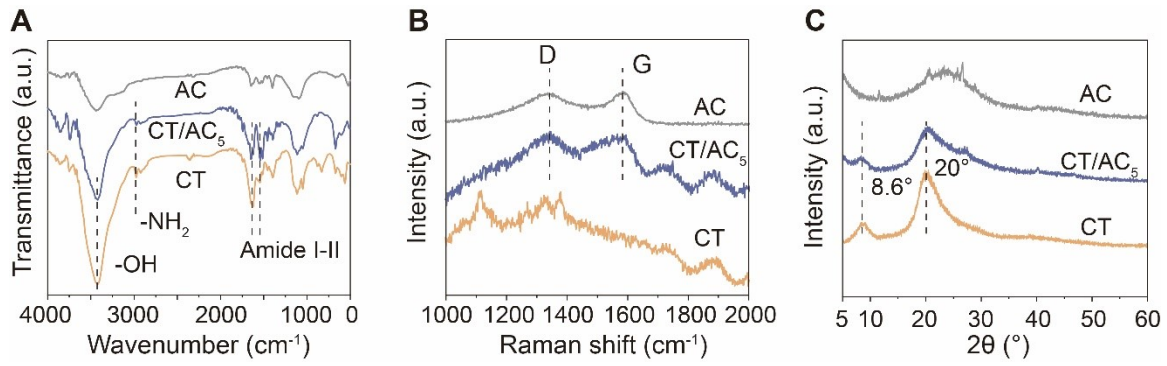

**Figure S2. (A) FTIR, (B) Raman and (C) XRD spectra of CT/AC<sub>5</sub> sponge, CT sponge and AC.**

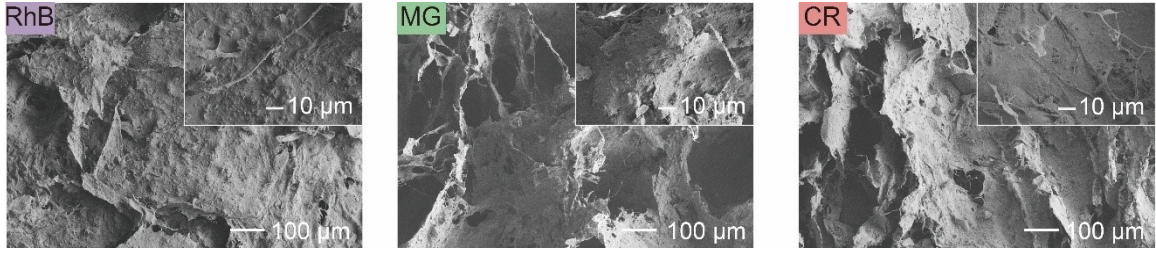

**Figure S3. SEM of CT/AC<sub>5</sub> adsorbing (a) RhB, (b) MG, and (c) CR.**

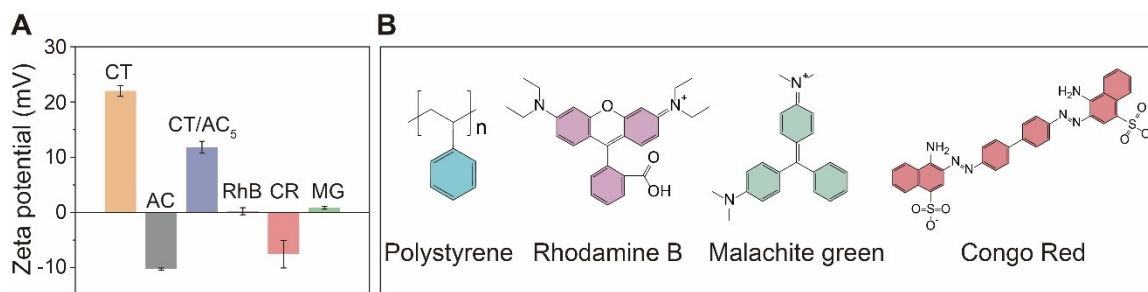

**Figure S4. (a) Zeta potentials of CT, AC, CT/AC<sub>5</sub> and pollutants. (b) Structural formulas of PS, RhB, MG, and CR.**

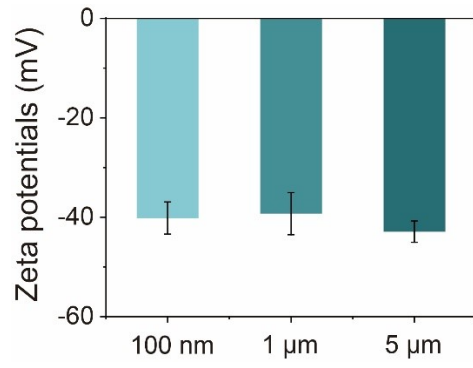

**Figure S5. Zeta potentials of PS with different size.**

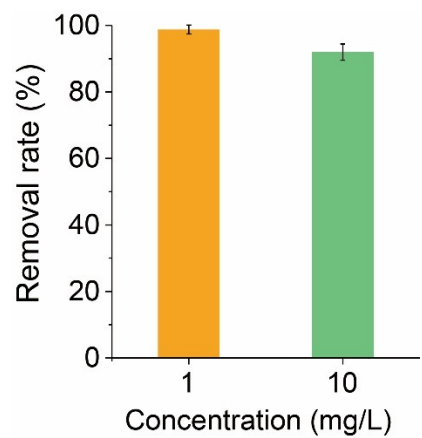

**Figure S6. The 5  $\mu\text{m}$  PS removal rate of CT/AC<sub>5</sub> at the concentration of environment levels (1 and 10 mg/L).**

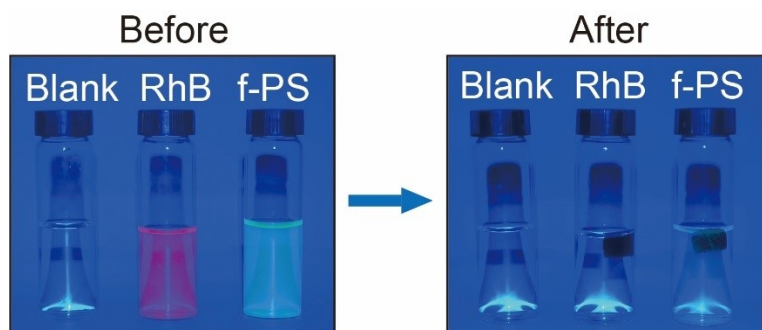

**Figure S7. Photos of RhB and fluorescent-PS (f-PS) before and after CT/AC<sub>5</sub> treatment under UV light.**

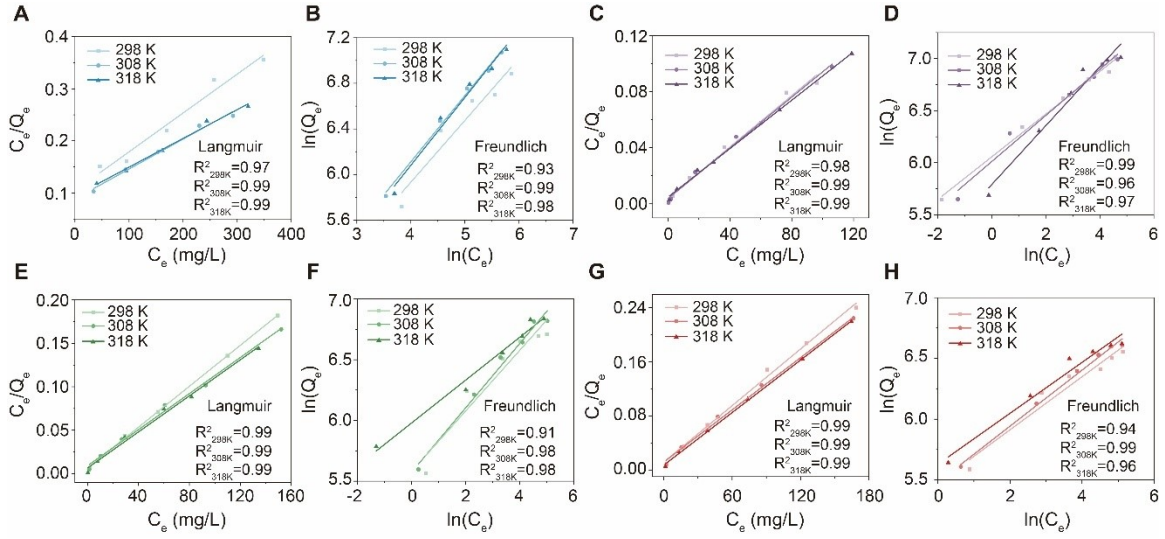

**Figure S8. Adsorption isotherms fitted by Langmuir and Freundlich models for adsorption of (A, B) PS microsphere, (C, D) RhB, (E, F) MG, and (G, H) CR on CT/AC<sub>5</sub>.**

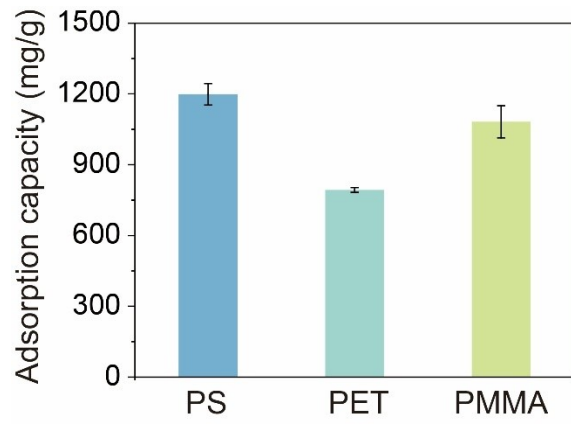

**Figure S9. Adsorption capacity of PET and PMMA of CT/AC<sub>5</sub>.**

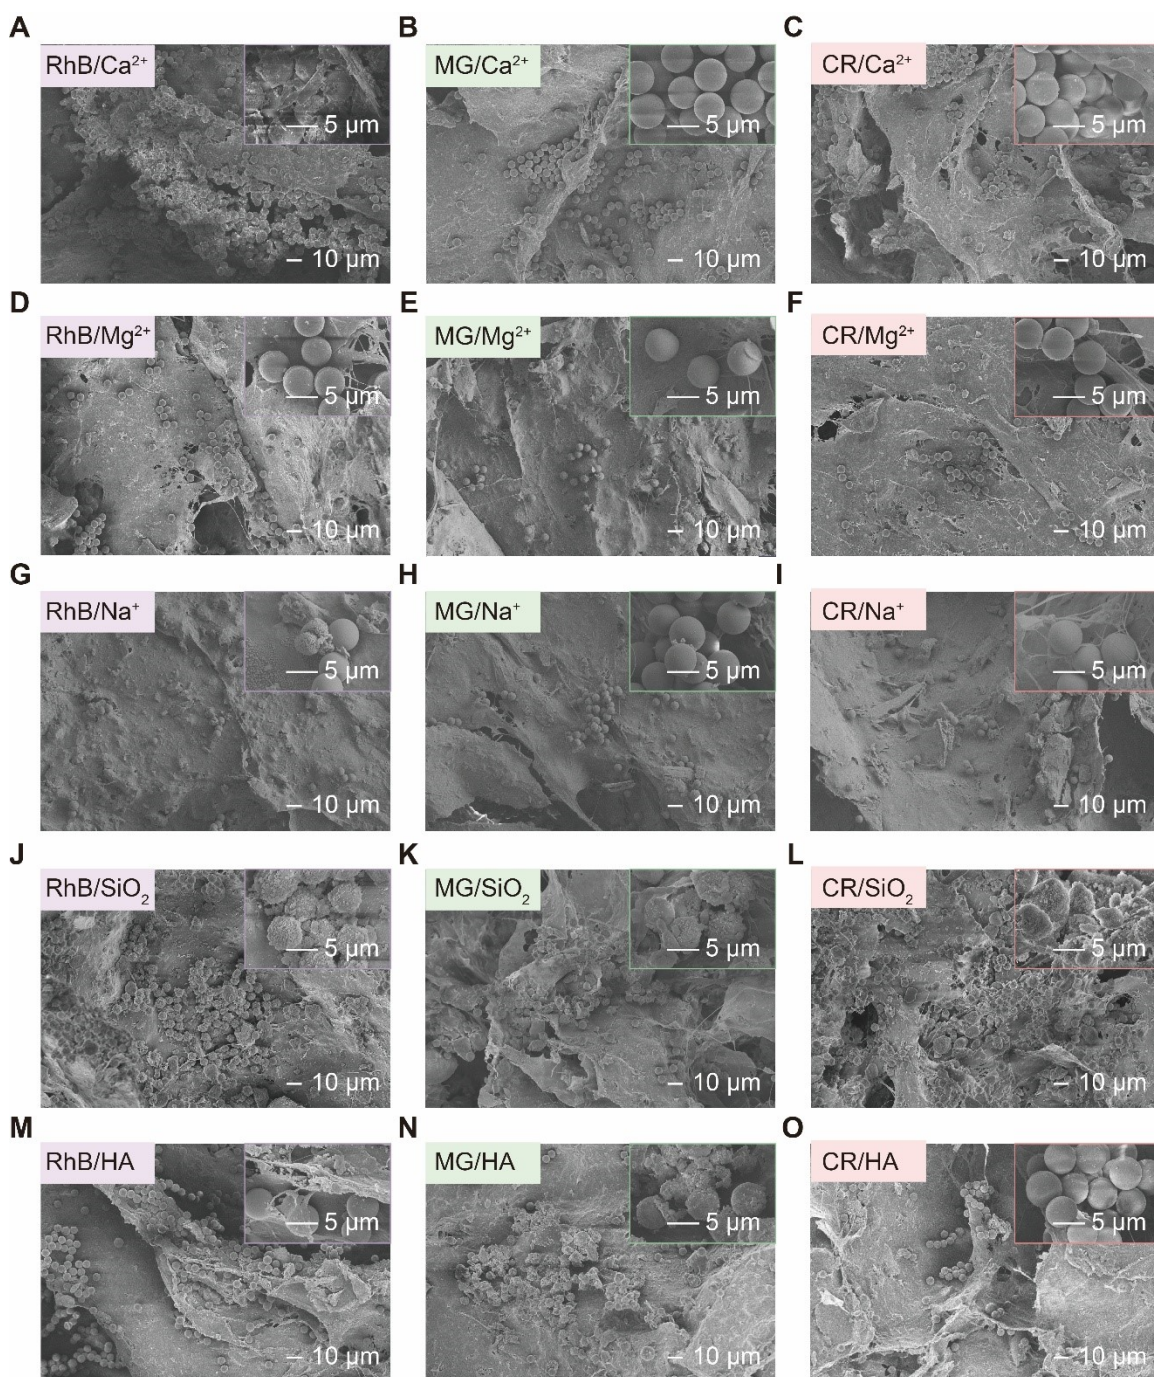

**Figure S10. SEM of CT/AC<sub>5</sub> for binary pollutants under the influence of different factors. (A-C) Ca<sup>2+</sup>, (D-F) Mg<sup>2+</sup>, (G-I) Na<sup>+</sup>, (J-L) SiO<sub>2</sub>, (M-O) HA. The concentration of metal ions and humic acid was 30 ppm, and the concentration of SiO<sub>2</sub> was 250 ppm.**

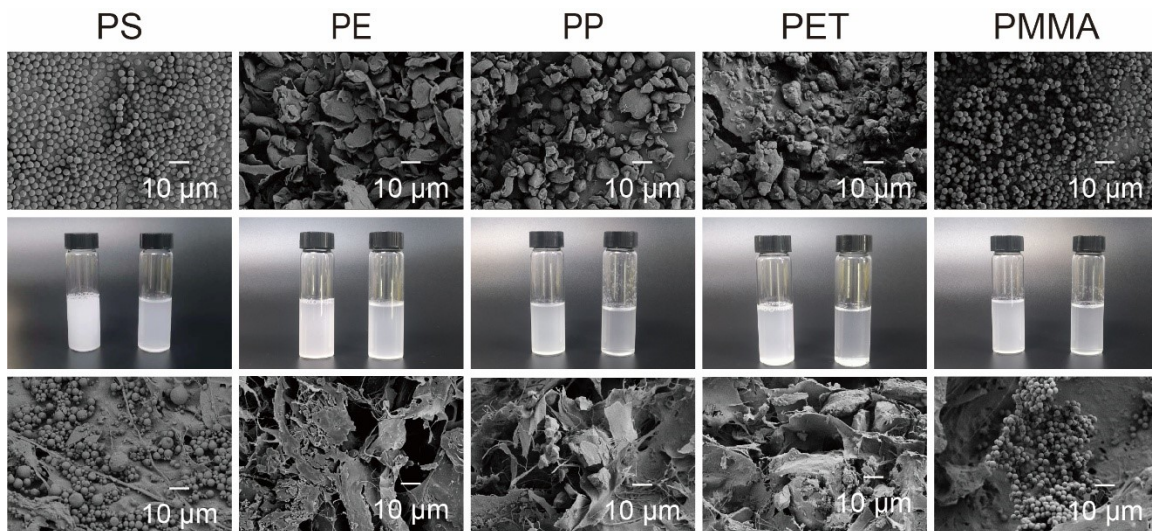

**Figure S11. SEM images of different MPs (PS, PE, PP, PET, and PMMA), the solvent before and after CT/AC<sub>5</sub> treatment, and the morphology of CT/AC<sub>5</sub> after adsorption.**

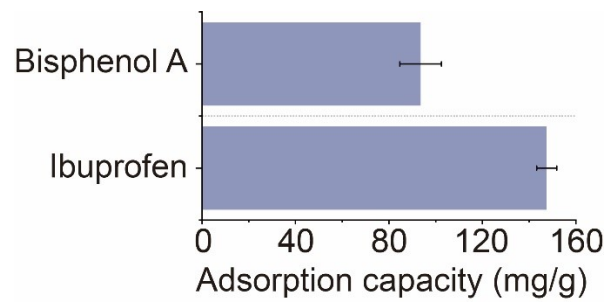

**Figure S12. Adsorption capacity of CT/AC<sub>5</sub> for bisphenol A and Ibuprofen.**

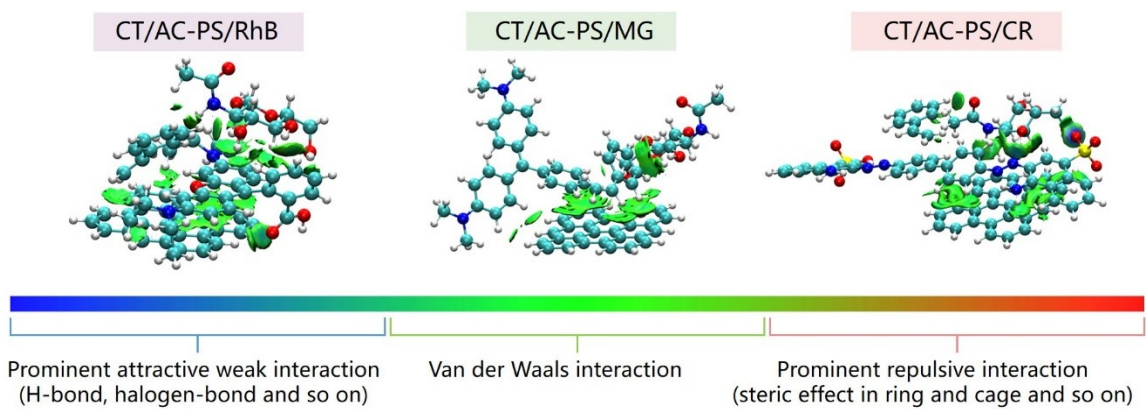

**Figure S13. IGMH-based non-covalent interaction analysis between CT/AC and PS and dyes (PS/RhB, PS/MG, and PS/CR).**

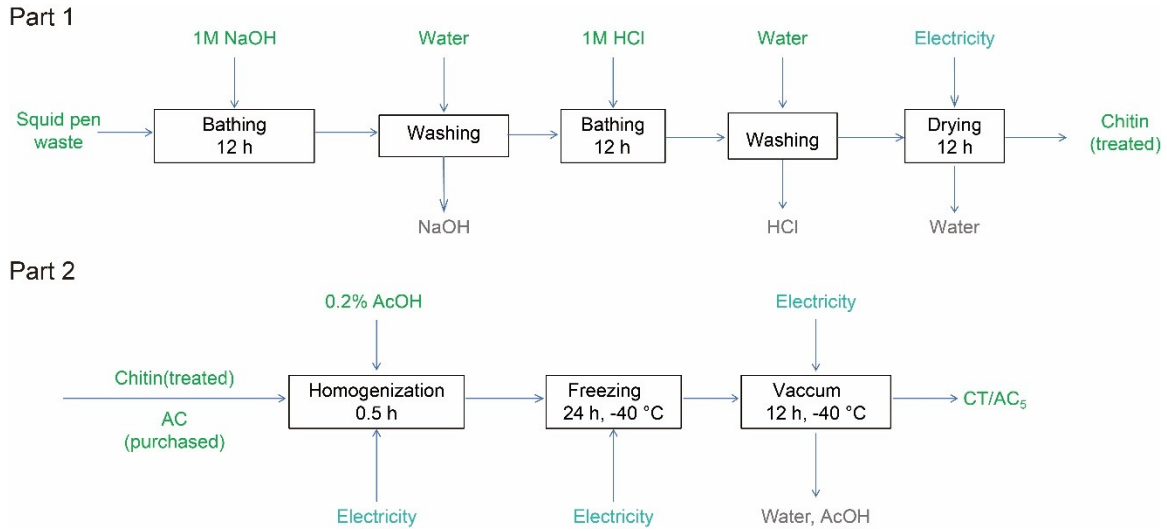

**Figure S14. Unit processes for chitin extraction and CT/AC<sub>5</sub> sponge preparation.**

**Table S1. The scoring criteria of CT/AC, CT, granular AC, and AC in terms of adsorption capacity, economy, sustainability, environmental tolerance, and recyclability.**

| Sample | Adsorption capacity | Economy | Sustainability | Environmental tolerance | Recyclability |
|--------|---------------------|---------|----------------|-------------------------|---------------|
| CT     | 5                   | 8       | 6              | 5                       | 7             |
| CT/AC  | 9                   | 9       | 9              | 9                       | 9             |
| GAC    | 2                   | 7       | 4              | 8                       | 7             |
| AC     | 6                   | 9       | 4              | 8                       | 5             |

We compared the CT/AC with CT, GAC, and AC in terms of adsorption capacity, economy, sustainability, environmental tolerance, and recyclability. The evaluation and scoring of CT, CT/AC, GAC, and AC were conducted based on the experimental results obtained.

In terms of adsorption capacity, CT showed exceptional uptake for PS microplastics (800.23 mg/g) and CR (635.75 mg/g), along with moderate adsorption for RhB (40.10 mg/g) and MG (154.35 mg/g). The CT/AC exhibited significantly enhanced performance, achieving 1177.17 mg/g for PS, 1038.86 mg/g for RhB, 911.23 mg/g for MG, and 734.47 mg/g for CR. In contrast, GAC displayed very low adsorption across all tested pollutants, with values of only 2.43 mg/g for PS and 4.10-14.86 mg/g for the dyes. AC showed moderate adsorption for PS (102.43 mg/g) but relatively high capacities for RhB (735.65 mg/g), MG (615.26 mg/g), and CR (544.74 mg/g). In conclusion, CT exhibited superior adsorption for PS and CR, whereas AC was more effective for general dye removal. The CT/AC composite successfully integrated the benefits of both components, while GAC displayed limited adsorption capacity, likely due to its poor dispersion.

CT was derived from waste squid pen biomass and required a simple fabrication process. Both GAC and AC were low-cost materials, but their preparation involved energy-intensive steps such as high-temperature treatment and steam activation. CT/AC was

composed of AC and waste-derived CT, offering economic advantages due to the low cost of raw materials and the simplicity of its fabrication.

CT exhibited good sustainability in post-treatment processes, such as cyclic adsorption and integrated hot-pressing. In contrast, the fabrication of AC and GAC was energy-intensive. CT/AC was composed of waste-derived biopolymer (CT) and AC, demonstrating strong sustainability through its reusability, potential for hot-pressing regeneration, and high-value conversion. LCA results further indicated that CT/AC had a lower carbon footprint compared to the other materials.

In terms of environmental tolerance, AC and GAC possessed granular hardness, which maintained stable adsorption capacity in polluted water. CT provided a soft and flexible framework but lacked mechanical strength. In comparison, CT/AC exhibited robust mechanical performance in harsh environment.

Recyclability: GAC and CT showed good recoverability due to their hard granular or bulk form, whereas AC showed limited recovery ability because of its powdery form. CT/AC overcame the limitation of powder and offered a unique and efficient regeneration pathway.

**Table S2. The specific surface area, pore volume, average pore diameter and micropore volume of CT/AC<sub>5</sub> sponge, CT sponge and AC.**

| <b>Parameter</b>              | <b>Unit</b>        | <b>CT sponge</b> | <b>CT/AC<sub>5</sub></b> | <b>AC</b> |
|-------------------------------|--------------------|------------------|--------------------------|-----------|
| BET specific surface area     | m <sup>2</sup> /g  | 36.60            | 552.80                   | 1234.20   |
| Total pore volume             | cm <sup>3</sup> /g | 0.05             | 0.58                     | 1.21      |
| Average pore diameter         | nm                 | 5.42             | 4.20                     | 3.94      |
| Micropore volume<br>(MP-plot) | cm <sup>3</sup> /g | 0.01             | 0.14                     | 0.33      |

**Table S3. Overview of main adsorption experiments conducted in this study.**

| Experiment type                                                    | Pollutants                            | C (ppm)                                                                | Dosage (mg)/<br>Volume (ml) | T (K)/<br>Equilibrium time(h) |
|--------------------------------------------------------------------|---------------------------------------|------------------------------------------------------------------------|-----------------------------|-------------------------------|
| Dyes removal                                                       | RhB, MG, CR, MB,<br>MO, CV            | 200                                                                    | 3.5/20                      | 298/24                        |
| PS removal                                                         | PS (100, 500, 1000,<br>3000, 5000 nm) | 500                                                                    | 3.5/20                      | 298/24                        |
| Batch under<br>different initial<br>concentration                  | PS, Dyes (RhB,<br>MG, CR)             | PS: 100, 200, 300,<br>400, 500<br>Dyes: 50, 100,<br>150, 200, 250, 300 | 3.5/20                      | 298/24                        |
| Adsorption<br>kinetics                                             | PS, Dyes (RhB,<br>MG, CR)             | PS: 500<br>Dyes: 250                                                   | 3.5/20                      | 298/48                        |
| Adsorption<br>isotherm                                             | PS, Dyes (RhB,<br>MG, CR)             | PS: 100, 200, 300,<br>400, 500<br>Dyes: 50, 100,<br>150, 200, 250, 300 | 3.5/20                      | 298/24, 308/24,<br>318/24     |
| Batch removal<br>under different pH                                | PS, Dyes (RhB,<br>MG, CR)             | PS: 500<br>Dyes: 250                                                   | 3.5/20                      | 298/24                        |
| Batch removal<br>under different salt<br>concentration             | PS, Dyes (RhB,<br>MG, CR)             | PS: 500<br>Dyes: 250                                                   | 3.5/20                      | 298/24                        |
| MPs removal                                                        | PS, PE, PP, PET,<br>PMMA              | 500                                                                    | 3.5/20                      | 298/24                        |
| Antibiotic removal                                                 | Ibuprofen,<br>Bisphenol A             | 100                                                                    | 3.5/20                      | 298/24                        |
| Batch removal of<br>binary pollutants<br>at different<br>condition | PS/RhB, PS/MG,<br>PS/CR               | PS:500<br>Dyes:250                                                     | 3.5/20                      | 298/24                        |
| Dynamic<br>adsorption<br>removal of binary<br>pollutants           | PS/RhB, PS/MG,<br>PS/CR               | PS:20<br>Dyes:20                                                       | 1000/500                    | 298/24                        |

Where  $T$  (K) is the absolute temperature.

**Table S4. Relevant kinetic parameters fitted by the pseudo-first-order and pseudo-second-order adsorption kinetic models.**

| Pollutants | Pseudo-first-order model |                       |       | Pseudo-second-order model |                       |       |
|------------|--------------------------|-----------------------|-------|---------------------------|-----------------------|-------|
|            | $q_e$ (mg/g)             | $k_1$ (g/mg min)      | $R^2$ | $q_e$ (mg/g)              | $k_2$ (g/mg min)      | $R^2$ |
| PS         | 1036.70                  | $1.30 \times 10^{-3}$ | 0.98  | 1250.00                   | $2.86 \times 10^{-3}$ | 0.94  |
| RhB        | 633.08                   | $1.60 \times 10^{-3}$ | 0.97  | 1111.11                   | $1.04 \times 10^{-2}$ | 0.99  |
| MG         | 499.85                   | $1.70 \times 10^{-3}$ | 0.94  | 909.09                    | $5.50 \times 10^{-3}$ | 0.98  |
| CR         | 648.39                   | $1.30 \times 10^{-3}$ | 0.93  | 769.23                    | $1.04 \times 10^{-2}$ | 0.99  |

The data obtained from the analysis of pseudo-first-order kinetic model (S1) and pseudo-second-order kinetic model (S2) were calculated according to the following equations:

$$\ln(q_e - q_t) = \ln(q_e) - k_1 t \quad (\text{S1})$$

$$\frac{t}{q_t} = \frac{1}{k_2 q_e^2} + \frac{t}{q_e} \quad (\text{S2})$$

where  $k_1$  (g/mg min) and  $k_2$  (g/mg min) are the rate constants of pseudo-first-order and pseudo-second-order model, respectively;  $q_e$  and  $q_t$  (mg/g) are the pollutant uptake at equilibrium and at time  $t$  min, respectively.

**Table S5. Intraparticle diffusion model parameters.**

| Pollutants | $k_{i1}$ | $k_{i2}$ | $k_{i3}$ | $C_{i1}$ | $C_{i2}$ | $C_{i3}$ | $R_1^2$ | $R_2^2$ | $R_3^2$ |
|------------|----------|----------|----------|----------|----------|----------|---------|---------|---------|
| PS         | 32.33    | 14.65    | 214.83   | 96.11    | 249.36   | 18.95    | 0.95    | 0.92    | 0.89    |
| RhB        | 61.12    | 24.17    | 5.25     | 67.06    | 352.98   | 820.63   | 0.92    | 0.99    | 0.99    |
| MG         | 59.91    | 21.74    | 5.82     | 129.55   | 176.84   | 569.90   | 0.99    | 0.98    | 0.88    |
| CR         | 28.04    | 15.93    | 5.86     | 99.93    | 181.15   | 467.11   | 0.87    | 0.99    | 0.72    |

The data obtained from the analysis of the intra-particle diffusion model(S3) were calculated according to the following equation:

$$q_t = k_{id}t^{0.5} + C \quad (S3)$$

where  $k_{id}$ (mg/g min<sup>1/2</sup>) is the rate constant of intra-particle diffusion model;  $q_t$ (mg/g) is the uptake at time  $t$ ;  $C$  (mg/g) is intercept which can reflect the boundary layer thickness.

**Table S6. The relevant parameters were determined according to Langmuir and Freundlich models.**

| Pollutants | Langmuir model |              |                       |       | Freundlich model |         |       |
|------------|----------------|--------------|-----------------------|-------|------------------|---------|-------|
|            | T (K)          | $q_m$ (mg/g) | $k_L$ (L/g)           | $R^2$ | $k_f$ (mg/g)     | n (g/L) | $R^2$ |
| PS         | 298            | 1340.30      | $7.20 \times 10^{-3}$ | 0.99  | 42.96            | 1.84    | 0.93  |
|            | 308            | 1519.76      | $7.20 \times 10^{-3}$ | 0.99  | 44.03            | 1.72    | 0.99  |
|            | 318            | 1666.67      | $6.70 \times 10^{-3}$ | 0.99  | 40.28            | 1.68    | 0.98  |
| RhB        | 298            | 1092.93      | 0.23                  | 0.98  | 426.44           | 4.88    | 0.98  |
|            | 308            | 1106.92      | 0.24                  | 0.99  | 326.69           | 3.54    | 0.96  |
|            | 318            | 1159.31      | 0.18                  | 0.99  | 407.65           | 4.52    | 0.97  |
| MG         | 298            | 847.46       | 0.19                  | 0.99  | 264.56           | 4.01    | 0.91  |
|            | 308            | 961.54       | 0.11                  | 0.99  | 263.10           | 3.78    | 0.98  |
|            | 318            | 961.54       | 0.16                  | 0.99  | 394.79           | 5.67    | 0.98  |
| CR         | 298            | 714.29       | 0.12                  | 0.99  | 238.82           | 4.58    | 0.94  |
|            | 308            | 775.19       | 0.11                  | 0.99  | 240.06           | 4.33    | 0.99  |
|            | 318            | 769.23       | 0.18                  | 0.99  | 278.29           | 4.77    | 0.96  |

The data obtained by using Langmuir (S4) and Freundlich (S5) models to explain the adsorption isotherm was shown in Table S5.

$$\frac{\gamma_e}{q_e} = \frac{1}{K_L q_m} + \frac{\gamma_e}{q_m} \quad (S4)$$

$$\ln q_e = \ln k_F + \frac{1}{n} \ln C_e \quad (S5)$$

where  $T$  (K) is the absolute temperature,  $q_e$  (mg/g) is the equilibrium uptake,  $q_m$  (mg/g) is the maximum uptake capacity,  $\gamma_e$  (mg/L) is the concentration of pollutants at adsorption equilibrium.

**Table S7. Thermodynamic parameters of pollutants adsorption to CT/AC<sub>5</sub>.**

| Pollutants | Temperature (K) | $\Delta G$ (KJ/mol) | $\Delta S$ (J/mol) | $\Delta H$ (KJ/mol) |
|------------|-----------------|---------------------|--------------------|---------------------|
| PS         | 298             | -2.56               | 65.34              | 16.80               |
|            | 308             | -3.57               |                    |                     |
|            | 318             | -4.47               |                    |                     |
| RhB        | 298             | -5.90               | 8.41               | 8.57                |
|            | 308             | -5.96               |                    |                     |
|            | 318             | -6.07               |                    |                     |
| MG         | 298             | -4.22               | 44.85              | 9.17                |
|            | 308             | -4.60               |                    |                     |
|            | 318             | -5.12               |                    |                     |
| CR         | 298             | -3.53               | 23.91              | 3.58                |
|            | 308             | -3.82               |                    |                     |
|            | 318             | -4.00               |                    |                     |

In order to further study the thermodynamic mechanism of adsorption, the standard Gibbs free energy change ( $\Delta H$ ) and standard entropy change ( $\Delta S$ ) were calculated using the following formulas (S6), (S7), (S8).

$$k_d = \frac{q_e}{\gamma_e} \quad (\text{S6})$$

$$\Delta G = -RT \ln k_d \quad (\text{S7})$$

$$\ln k_d = \frac{\Delta S}{R} - \frac{\Delta H}{RT} \quad (\text{S8})$$

where  $R$  (8.314 J/mol K) is the universal gas constant,  $k_d$  (mL/g) is the distribution coefficient,  $\gamma_e$  (mg/L) is the concentration of pollutants at adsorption equilibrium, and  $q_e$  (mg/g) is the pollutants adsorption capacity at equilibrium.

**Table S8. Cost calculation for adsorbent.**

| <b>Materials</b>   | <b>Reagent</b>                                                                                                              | <b>Main processes</b>                                                          | <b>Cost (\$)/g</b> |
|--------------------|-----------------------------------------------------------------------------------------------------------------------------|--------------------------------------------------------------------------------|--------------------|
| ChGO               | Chitin, NaOH, Urea, Epichlorohydrin (ECH), Ethanol, Graphene oxide                                                          | Ultrasound 20 min<br>Freezing 16 h<br>Lyophilization 48 h<br>4°C gelation 24 h | 454.54-710.28      |
| ChCB               | Chitin, Carbon black, NaOH, Urea, Epichlorohydrin, Ethanol                                                                  | Freezing-thawing cycle<br>Lyophilization 48 h                                  | 0.07-0.11          |
| GO/CS/GP           | Chitosan, Graphene oxide, Genipin, Acetic acid, NaOH, Ethanol                                                               | Ultrasound 20 min<br>Freezing 24 h<br>Lyophilization 72 h                      | 68.29-123.00       |
| PDA-MCS            | Chitosan, Dopamine hydrochloride, Magnetic Fe <sub>3</sub> O <sub>4</sub> nanoparticles, ethanol                            | String 2 h<br>Freezing 24 h<br>Lyophilization 48 h                             | 4.29-8.71          |
| PDMS@ZIF-67/CS     | 2-Methylimidazole, Co (NO <sub>3</sub> ) <sub>2</sub> ·6H <sub>2</sub> O, Chitosan, Polydimethylsiloxane, NaOH, Acetic acid | Carbonization 11 h<br>Freezing 12 h<br>Lyophilization 24 h                     | 0.50-0.64          |
| CT/AC <sub>5</sub> | Chitin, AC, Acetic acid                                                                                                     | String 2 h<br>Freezing 12 h<br>Lyophilization 24 h                             | 0.02-0.06          |

**Table S9. Comparison of parameters with other adsorbents.**

| <b>Materials</b>   | <b>MPs</b>                                                            | <b>Dosage</b>            | <b>C (ppm)</b> | <b>Q (mg/g)</b>    | <b>Cost (\$)/g</b> | <b>Ref</b>   |
|--------------------|-----------------------------------------------------------------------|--------------------------|----------------|--------------------|--------------------|--------------|
| ChGO               | PS<br>PS-COOH<br>PS-NH <sub>2</sub><br>PS (1 μm)                      | 1 cm <sup>3</sup>        | 20             | 8.51 ± 0.60        | 454.54-<br>710.28  | 1            |
| ChCB               | PS (1 μm)                                                             | 20 mg                    | 20             | 99.74 ± 2.0        | 0.07-0.11          | 2            |
| GO/CS/GP           | PS (1 μm)                                                             | 0.01 g/20 ml             | 10             | 7.42 ± 0.7         | 68.29-<br>123.00   | 3            |
| PDA-MCS            | PET PE PS (10-<br>200 nm)                                             | -                        | 300            | 125 ± 17           | 4.29-8.71          | 4            |
| PDMS@ZIF<br>-67/CS | PS (488 nm)                                                           | 1 cm <sup>3</sup> /10 ml | 600            | 34.5               | 0.50-0.64          | 5            |
| CT/AC <sub>5</sub> | PS (100, 500,<br>1000, 3000,<br>5000 nm), PE,<br>PP, PET, and<br>PMMA | 3.5 mg/20 ml             | 500            | 1249.41 ±<br>53.83 | 0.02-0.06          | This<br>work |

**Table S10. The key operational parameters of fixed-bed adsorption apparatus.**

| Parameters         |        |
|--------------------|--------|
| Fixed-bed height   | 20 cm  |
| Influent flow rate | 50 rpm |
| Contact time       | 4 h    |

**Table S11. Life cycle assessment checklist**

| Comment       | Component                      | Amount | Unit  | Source/Provider                                                                                                      |
|---------------|--------------------------------|--------|-------|----------------------------------------------------------------------------------------------------------------------|
| -             | Squid pen waste                | 1.61   | kg    | Waste input                                                                                                          |
| 1 M,15.28 L   | NaOH                           | 1.29   | kg    | Sodium hydroxide, without water, in 50% solution state   market for   APOS, S                                        |
| 1 M,14.42 L   | HCl                            | 1.96   | kg    | Hydrochloric acid, without water, in 30% solution state   market for   APOS, U                                       |
| -             | AC                             | 0.50   | kg    | Activated carbon, granular   activated carbon production, granular from hard coal   APOS, S                          |
| -             | AcOH                           | 0.20   | kg    | Acetic acid, without water, in 98% solution state   acetaldehyde oxidation   APOS, S                                 |
| -             | Water for dilution             | 30     | L     | Tap water   tap water production,                                                                                    |
| -             | Water for sponge production    | 99.80  | L     | ultrafiltration treatment   APOS, S                                                                                  |
| 1.02 kW, 24 h | Electricity for stirring       | 24.48  | kWh   |                                                                                                                      |
| 0.5 kW, 12 h  | Electricity for drying         | 6      | kWh   |                                                                                                                      |
| 4.0 kW, 0.5 h | Electricity for homogenization | 2      | kWh   | Electricity, low voltage {CN}  market group for   APOS, S                                                            |
| 0.09 kW, 24 h | Electricity for freezing       | 2.16   | kWh   |                                                                                                                      |
| 37 kW, 12 h   | Electricity for vacuum drying  | 444    | kWh   |                                                                                                                      |
| 185 km        | transport, freight, lorry      | -      | kg km | Transport, freight, lorry, unspecified   transport, freight, lorry, all sizes, EURO6 to generic market for   APOS, S |
| -             | biowaste                       | 1.11   | kg    | Biowaste   treatment of biowaste, industrial composting   APOS, S                                                    |
| -             | wastewater                     | 30     | L     | Wastewater, unpolluted   treatment of, capacity 5E9l/year   APOS, S                                                  |
| -             | wastewater                     | 99.80  | L     |                                                                                                                      |
| -             | CT/AC <sub>5</sub>             | 1      | kg    | Output materials                                                                                                     |

## Supplementary References

- (1) C. Sun, Z. Wang, L. Chen, F. Li, *Chem. Eng. J.* 2020, **393**, 124796.
- (2) Z. Zhu, X. Wu, C. Wang, Z. Meng, C. Sun, Z. Wang, *Sep. Purif. Technol.* 2023, **322**, 124321.
- (3) M. Ko, T. Jang, S. Yoon, J. Lee, J. H. Choi, J. W. Choi, J. A. Park, *Chemosphere* 2024, **356**, 141956.
- (4) B. Zheng, B. Li, H. Wan, X. Lin, Y. Cai, *J. Hazard. Mater.* 2022, **431**, 128611.
- (5) F. Liang, Y. Xu, S. Chen, Y. Zhu, Y. Huang, B. Fei, W. Guo, *ACS Appl. Mater. Interfaces* 2022, **14**, 56027-56045.
